# Supplementary material for: POSTN+ cancer-associated fibroblasts determine the efficacy of immunotherapy in hepatocellular carcinoma
Source: PubMed Central journal article supplement — J Immunother Cancer. 2024 Jul 26;12(7):e008721. doi: 10.1136/jitc-2023-008721 (PMC11284881; doi:10.1136/jitc-2023-008721), 2024-07-26
Supplement: jitc-12-7-s004.pdf [file jitc-12-7-s004.pdf]

1 POSTN<sup>+</sup> cancer-associated fibroblasts determine the efficacy of  
2 immunotherapy in hepatocellular carcinoma

3

4 Hao Wang<sup>1, 2, †</sup>, Yuan Liang<sup>2, 4, †</sup>, Zheng Liu<sup>5, †</sup>, Rui Zhang<sup>2</sup>, Jiashuo Chao<sup>1, 2</sup>,  
5 Mingming Wang<sup>1, 2</sup>, Mu Liu<sup>2</sup>, Lei Qiao<sup>2</sup>, Zhengfeng Xuan<sup>2</sup>, Haitao Zhao<sup>1, \*</sup>, Ling Lu  
6 2, 3, \*

7 <sup>1</sup> Department of Liver Surgery, State Key Laboratory of Complex Severe and Rare  
8 Diseases, Peking Union Medical College Hospital, Chinese Academy of Medical  
9 Sciences and Peking Union Medical College (CAMS & PUMC), Beijing, China.

10 <sup>2</sup> Hepatobiliary Center of The First Affiliated Hospital, Nanjing Medical University;  
11 Research Unit of Liver Transplantation and Transplant Immunology, Chinese Academy  
12 of Medical Sciences, Nanjing, China.

13 <sup>3</sup> Affiliated Hospital of Xuzhou Medical University, Xuzhou, China.

14 <sup>4</sup> School of Biological Science & Medical Engineering, Southeast University, Nanjing,  
15 China.

16 <sup>5</sup> Department of General Surgery, the First Affiliated Hospital of Nanjing Medical  
17 University, Nanjing, China.

18 <sup>†</sup> These authors contributed equally to this work

19 \*Corresponding author.

20 Correspondence to Professor ling lv; Hepatobiliary Center of The First Affiliated Hospital,  
21 Nanjing Medical University; Research Unit of Liver Transplantation and Transplant  
22 Immunology, Chinese Academy of Medical Sciences, No. 300 Guangzhou Road,  
23 Nanjing 210029, China. Email: lvling@njmu.edu.cn.

24 Correspondence to Professor Haitao Zhao; Department of Liver Surgery, State Key  
25 Laboratory of Complex Severe and Rare Diseases, Peking Union Medical College  
26 Hospital, Chinese Academy of Medical Sciences and Peking Union Medical College  
27 (CAMS & PUMC), No. 1, Shuaifuyuan, Dongcheng District, Beijing 100730, China.  
28 E-mail: [zhaoht@pumch.cn](mailto:zhaoht@pumch.cn).

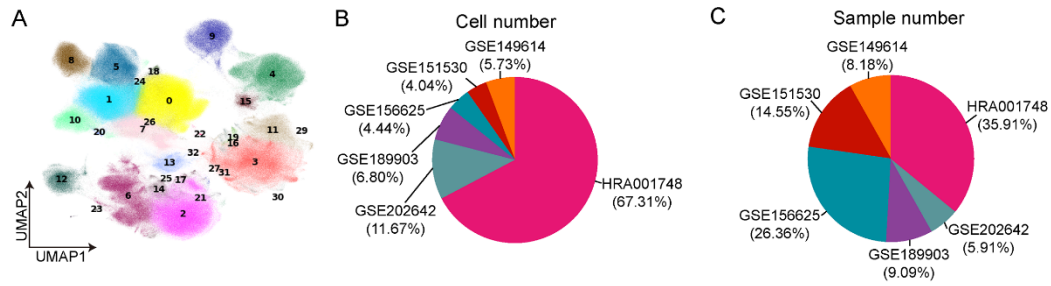

30

31 **Supplementary Figure 1. The containing cohorts and cluster information.**

32 (A) UMAP plot showing the distribution of the specific clusters. Dots represent individual cells.

33 (B) Pie chart showing the number of cells included in our study. The different colors represent

34 different studies. (C) Pie chart showing the sample number of our study. The different colors

35 represent different studies.

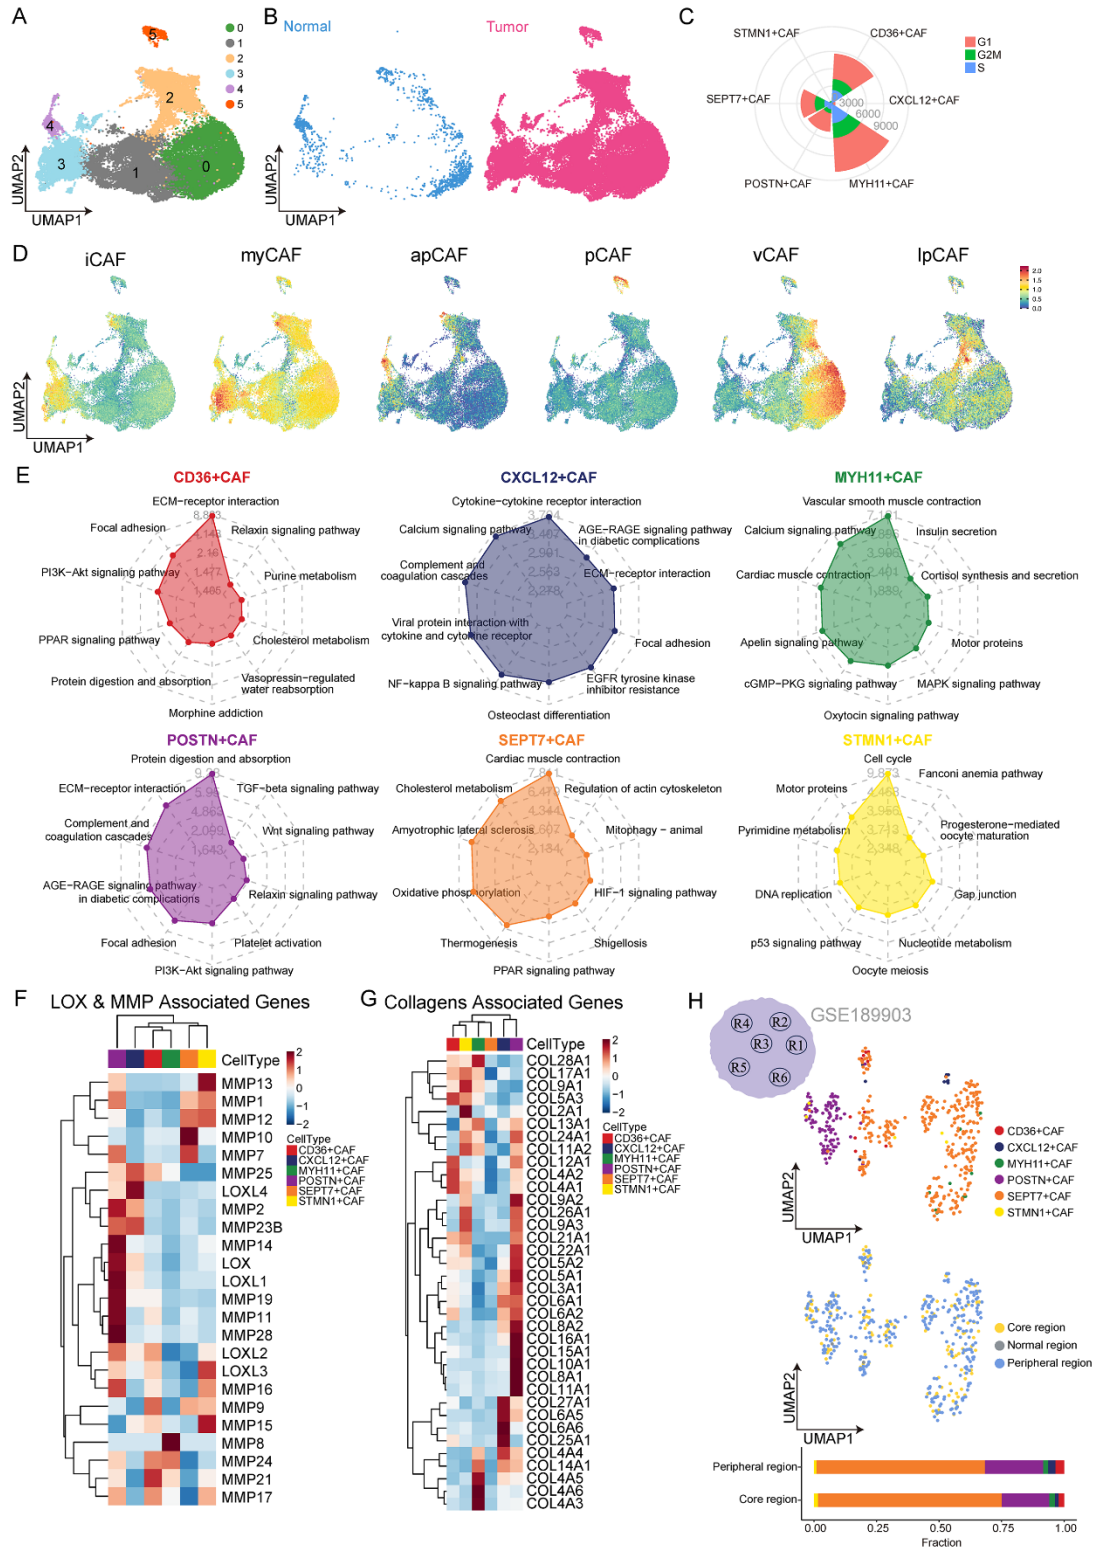

36

37 **Supplementary Figure 2. CAF re-clustering analysis in HCC.**

38 (A) UMAP plot showing the distribution of the CAF clusters. Dots represent individual cells.

39 The different colors represent different clusters. (B) UMAP plots showing the distribution of

40 the CAF clusters in normal (left) and tumor (right) samples. (C) Radar plot showing the  
41 distribution of the cell cycle state in each CAF subtype. (D) UMAP plots showing the  
42 distribution of scores of six CAF phenotypes. (E) Radar plots showing KEGG terms of  
43 differentially expressed genes significantly enriched in each CAF subtype. (F-G) Heatmap  
44 showing the mean expression of lipoxxygenase (LOX)- and matrix metalloproteinase (MMP)  
45 associated genes (F) and collagen (COL)-associated genes (G) in each CAF subtype. (H)  
46 UMAP plots showing the specific CAF subtypes (up) and spatial organization (middle) of CAF  
47 subtypes according to Sharma's scRNA-seq dataset. Bar plot showing the fraction of CAF  
48 subtypes in the core and peripheral regions in HCC tumors (bottom).

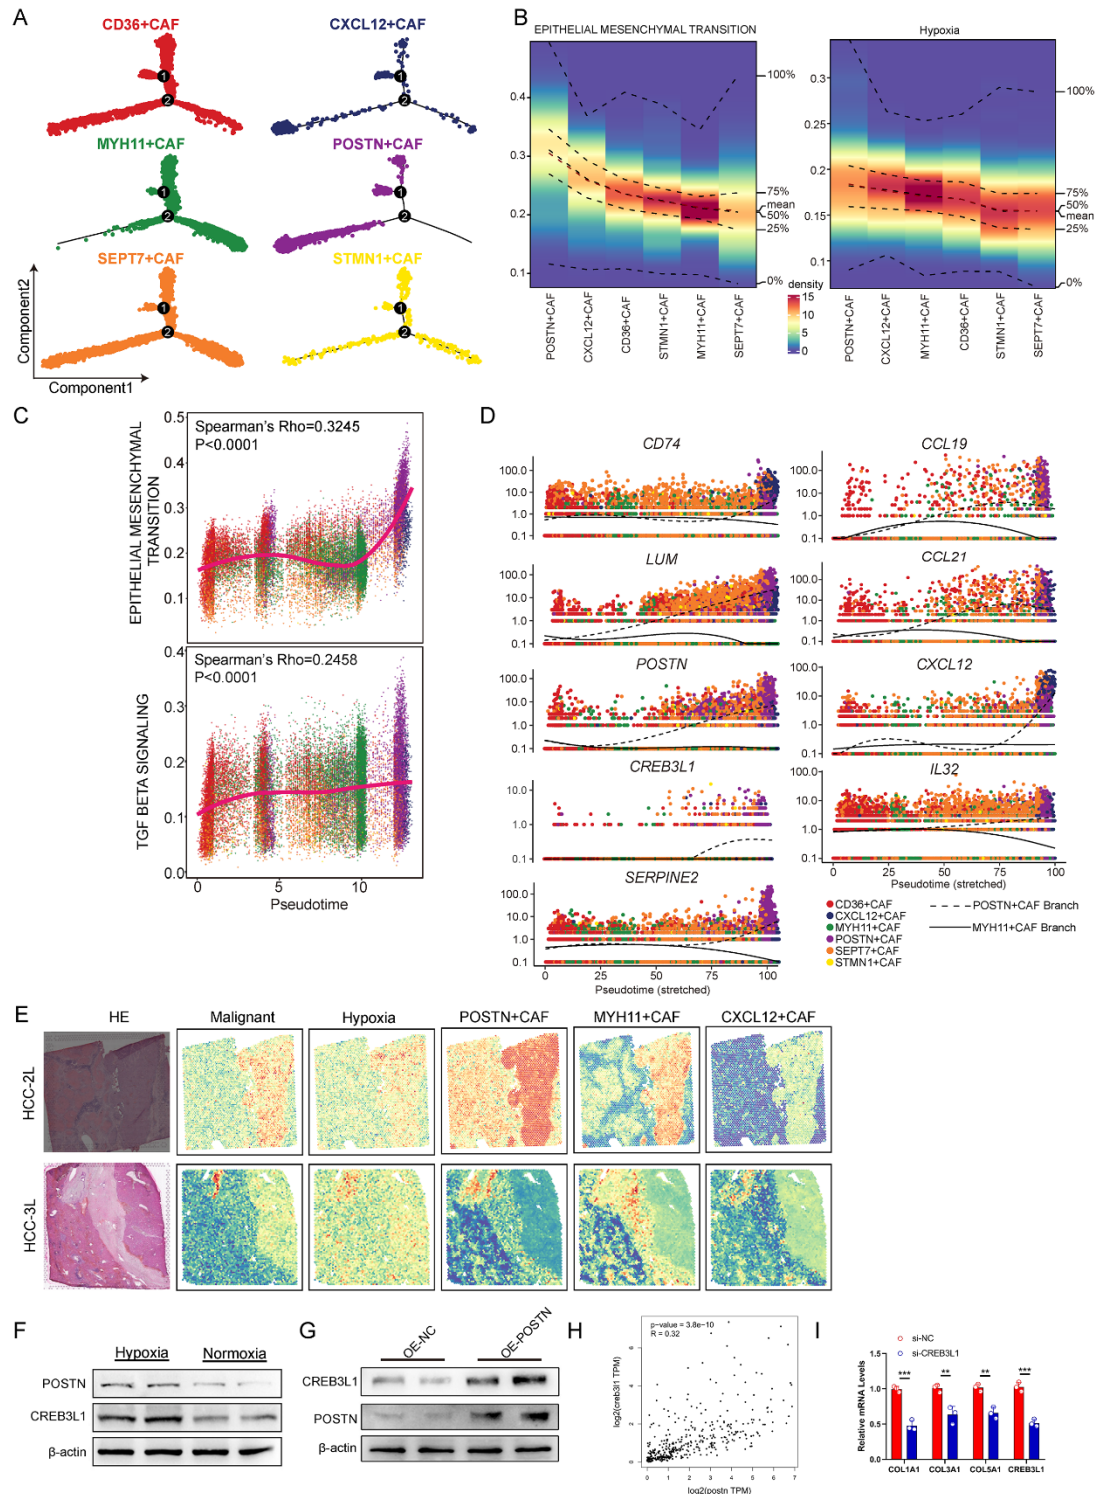

49

50 **Supplementary Figure 3. Pseudotime analysis of CAF subtypes in HCC.**

51 (A) The developmental trajectory of CAFs cells is inferred by the monocle2 subtype, which is

52 influenced by different CAF subtypes. The different colors represent different CAF subtypes.

53 (B) Density heatmaps showing the density of epithelial mesenchymal transition (left) and  
54 hypoxia (right) scores for each CAF subtype. (C) Dot plots showing the Spearman's correlation  
55 of the pseudotime and epithelial mesenchymal transition scores (up), or the TGF-beta signaling  
56 score (bottom). The different colors represent different CAF subtypes. (D) Pseudotime  
57 projections of transcriptional changes in *CD74*, *LUM*, *POSTN*, *SEPRINE2*, *CCL19*, *CCL21*,  
58 *CXCL12*, *CREB3L1*, and *IL32* between the two trajectory branches. (E) The Spatial HE staining  
59 and spatial feature plots of the signature scores of malignant cells, hypoxic cells, *POSTN*<sup>+</sup> CAFs,  
60 *MYH11*<sup>+</sup> CAFs, and *CXCL12*<sup>+</sup> CAFs in HCC-2L and HCC-3L sections (from left to right). (F)  
61 Western blot analysis indicated that the protein levels of *POSTN* and *CREB3L1* in CAFs under  
62 normoxia (20% O<sub>2</sub>) or hypoxia (1% O<sub>2</sub>). (G) Western blot analysis showing the protein levels  
63 of *POSTN* and *CREB3L1* in CAFs overexpressing *POSTN* (OE-*POSTN*-CAF) and in the  
64 control group (OE-NC-CAF). (H) *POSTN* expression was correlated with *CREB3L1*  
65 expression in the TCGA-LIHC cohort. (I) *COL1A1*, *COL3A1*, *COL5A1*, and *CREB3L1* levels  
66 were examined by qRT-PCR analysis (n=3). \*\*,  $p < 0.01$ . \*\*\*,  $p < 0.001$ .

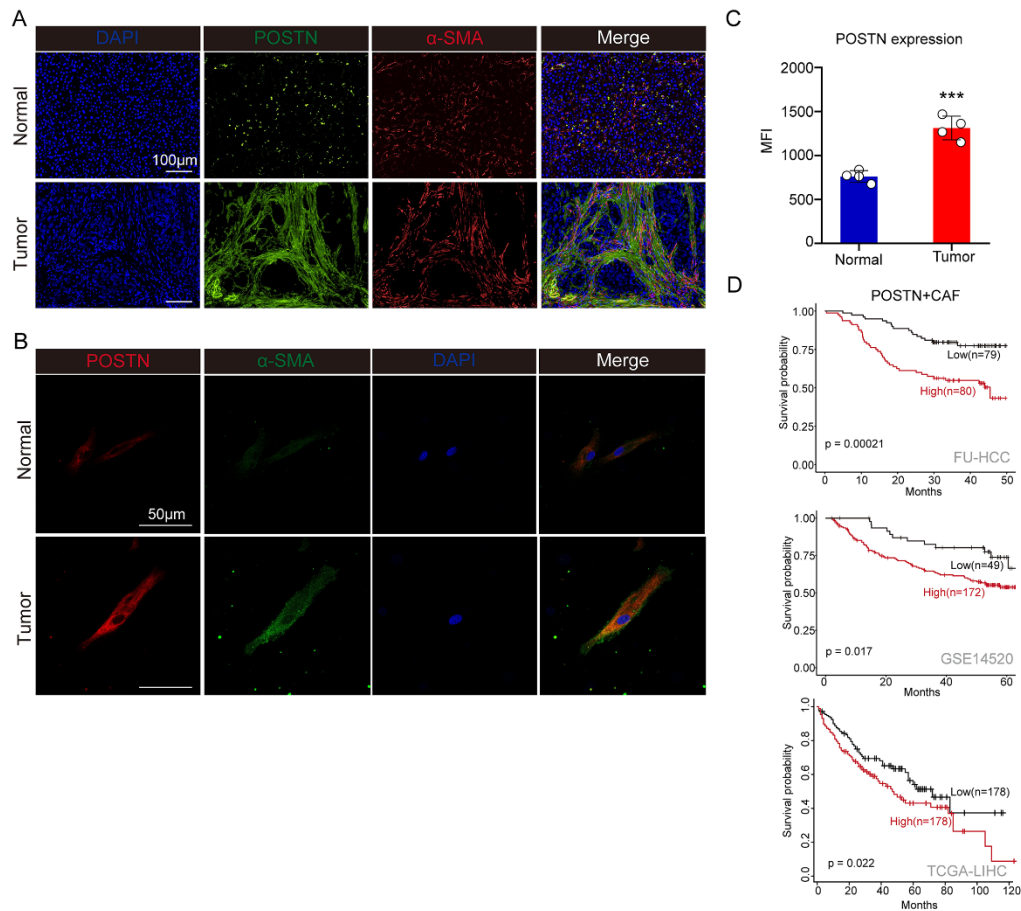

67

68 **Supplementary Figure 4. Tumor-infiltrating POSTN<sup>+</sup> CAFs influence patient survival**  
 69 **prognosis.**

70 (A) Representative IF staining of tumor and nontumor tissues. DAPI (blue), POSTN (green),  
 71 and  $\alpha$ -SMA (red) in individual and merged channels are shown. Bar, 100  $\mu$ m. (B) Comparison  
 72 of the mean fluorescence intensity (MFI) of POSTN in fibroblasts between paired nontumor  
 73 and tumor tissues (n=4). \*\*\*,  $p < 0.001$ . (C) Representative IF staining of fibroblasts in tumor  
 74 and no-tumor tissues. DAPI (blue),  $\alpha$ -SMA (green), and POSTN (red), in individual and merged  
 75 channels are shown. Bar, 50  $\mu$ m. (D) Kaplan–Meier survival analyses of patients with for low  
 76 and high infiltration of POSTN<sup>+</sup> CAFs in FU-HCC (up), GSE14520 (middle) and TCGA-LIHC  
 77 (bottom) cohorts.



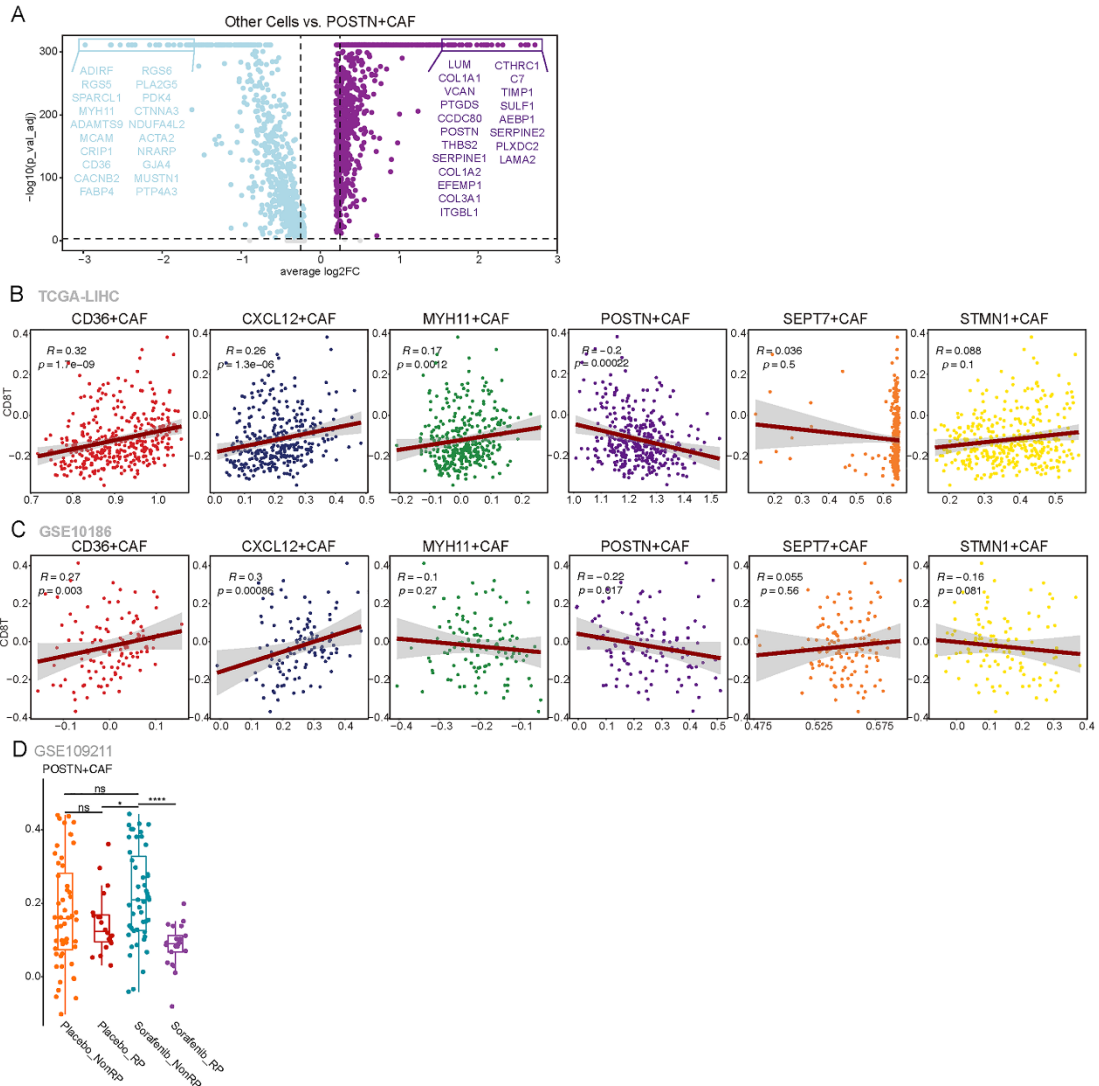

78

79 **Supplementary Figure 5. The infiltration of POSTN<sup>+</sup> CAFs was negatively correlated with**  
 80 **that of CD8<sup>+</sup> T cells.**

81 (A) Dot plot showing the differential expressed genes between POSTN<sup>+</sup> CAFs and other CAFs.

82 The Wilcoxon rank sum test was used to assess the differences. (B-C) Spearman's correlation

83 of the ssGSEA scores of each CAF subtype and CD8<sup>+</sup> T cells in TCGA-LIHC cohort (B) and

84 GSE10186 cohort (C). (D) Box plot showing the ssGSEA score of POSTN<sup>+</sup> CAFs in different

85 treatment groups in the GSE109211 dataset. The different colors represent different treatment

86 groups.



A

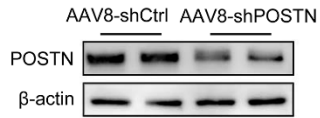

B

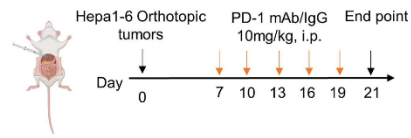

C

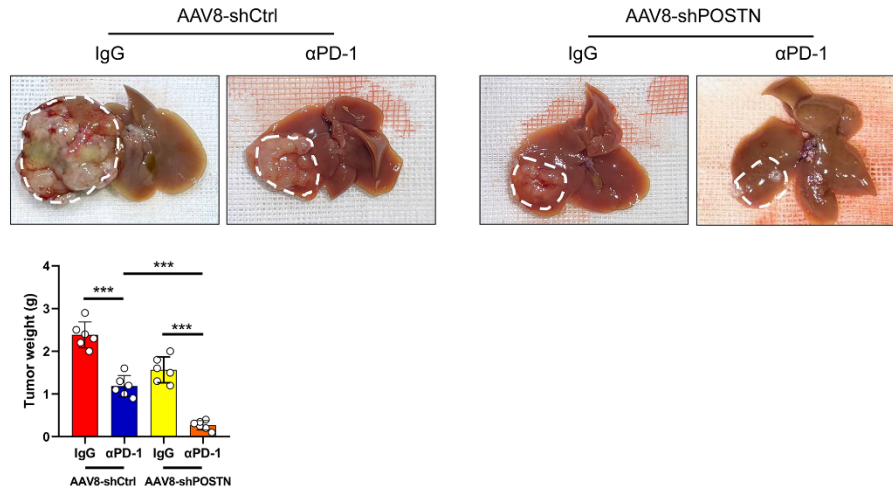

87

88 **Supplementary Figure 6. Targeting POSTN synergizes with immunotherapy in murine**  
 89 **HCC models.**

90 (A) Western blot analysis showing the protein levels of POSTN in the liver of mice treated with  
 91 AAV8-shPOSTN or AAV8-shCtrl. (B) Schematic view of the treatment plan for orthotopic  
 92 tumors. C57BL/6 mice treated with AAV8-shCtrl or AAV8-shPOSTN were implanted with  
 93 Hepa1-6 cells as orthotopic tumors and were treated with an anti-PD-1 mAb or an IgG isotype  
 94 control. (C) Representative orthotopic tumors obtained after the mice were euthanized (n=6).

95 \*\*\*,  $p < 0.001$ .

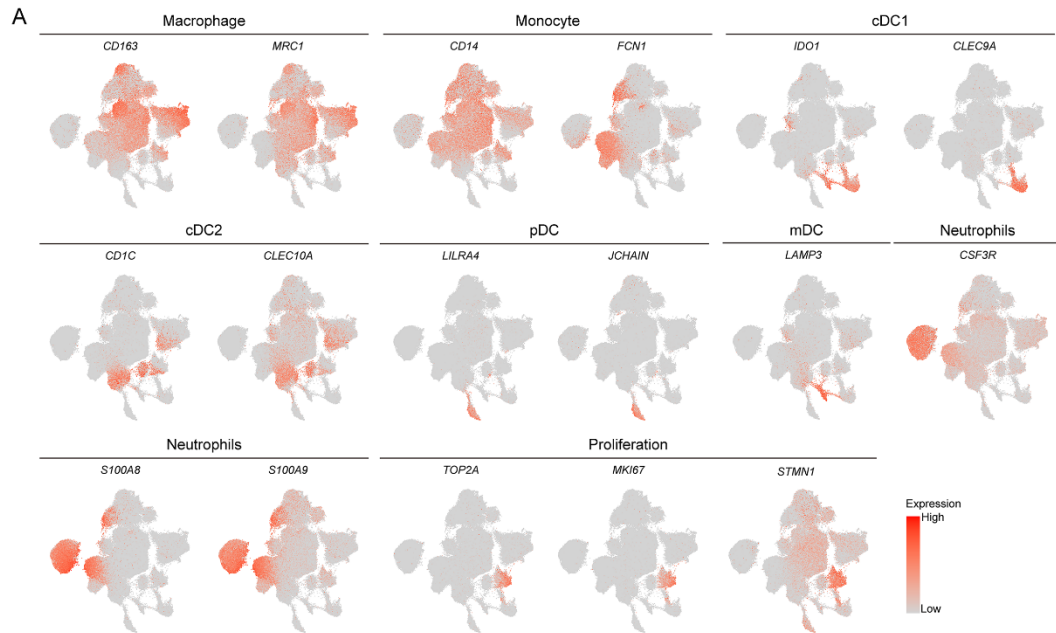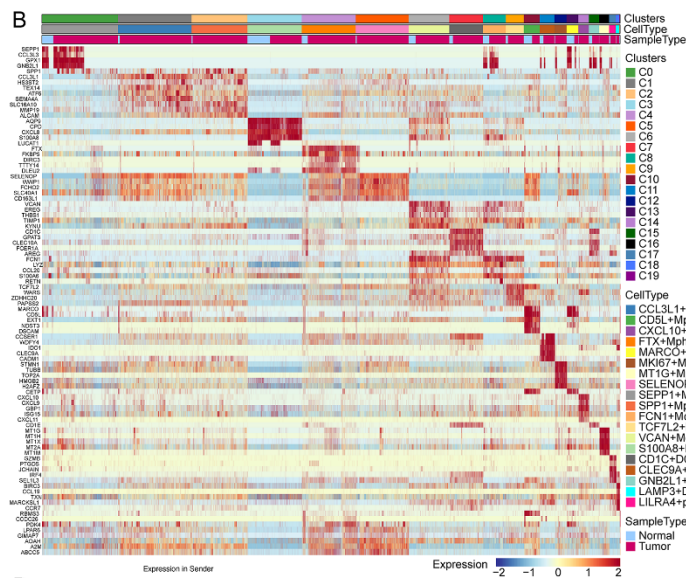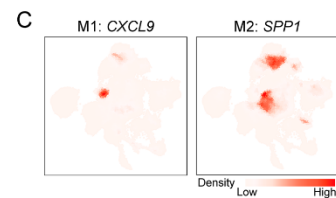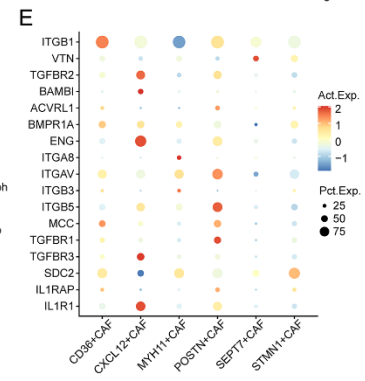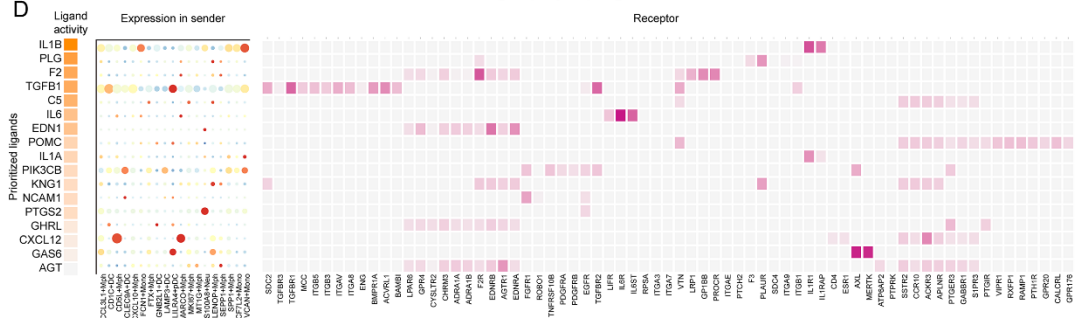

96

97 **Supplementary Figure 7. Myeloid cells reclustering analysis in HCC.**

98 (A) UMAP plots showing the distribution of genes associated with macrophages (*CD163*, and

99 *MRC1*), monocytes (*CD14*, and *FCN1*), cDC1s (*IDO1*, and *CLEC9A*), cDC2s (*CD1C*, and

100 *CLEC10A*), pDCs (*LILRA4*, and *JCHAIN*), mDCs (*LAMP3*), neutrophils (*CSF3R*, *S100A8*, and  
101 *S100A9*), and proliferation (*TOP2A*, *MKI67*, and *STMN1*). (B) Heatmap showing the top 5  
102 differential expressed genes in each cell of different myeloid subtypes. (C) UMAP plots  
103 showing the density of CXCL9 (M1 marker, left) and SPP1 (M2 marker, right) expression. (D)  
104 Top-ranked ligands inferred to regulate SPP1<sup>+</sup> macrophages via POSTN<sup>+</sup> CAFs according to  
105 NicheNet (left). Dot plots showing the expression percentage (dot size) and intensity (dot  
106 intensity) of the top-ranked ligands (left) in each CAF subtype (middle). Ligand–receptor pairs  
107 showing interactions between SPP1<sup>+</sup> macrophages and POSTN<sup>+</sup> CAFs ordered by ligand  
108 activity (eight). (E) Dot plots showing the percentage (dot size) and intensity (dot intensity) of  
109 IL1B or TGFB1-targeted receptors expression in each CAF subtype.

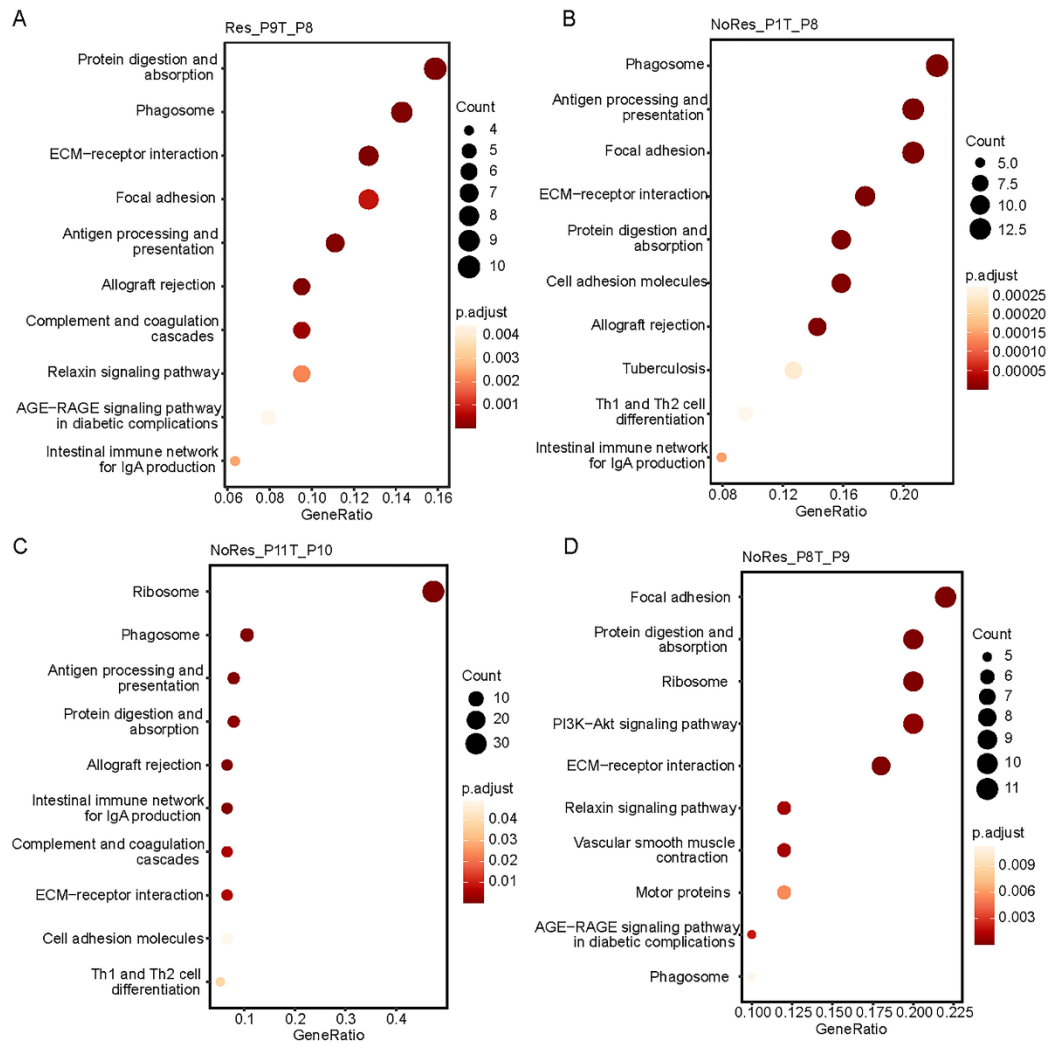

110

111 **Supplementary Figure 8. Functional enrichment analysis of selected gene programs.**

112 (A-D) Dot plots showing the top 10 enriched pathways in Res\_P9T\_P8 (A), NoRes\_P1T\_P8

113 (B), NoRes\_P11T\_P10 (C), and NoRes\_P8T\_P9 (D). The dot size represents the number of

114 enriched genes, and the color represents the adjusted  $p$  value.

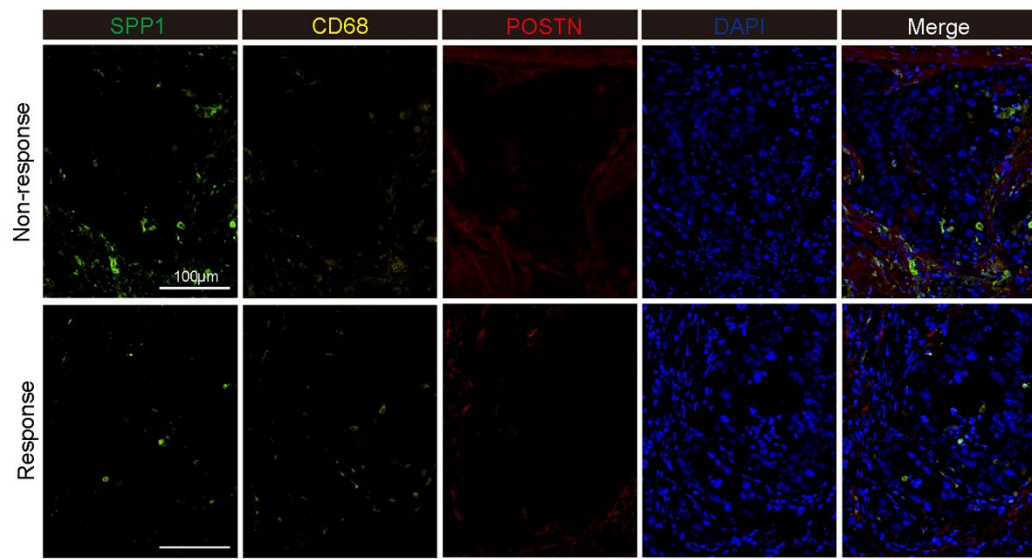

115

116 **Supplementary Figure 9. Response to immunotherapy in HCC patients affected by SPP1<sup>+</sup>**  
 117 **macrophages and POSTN<sup>+</sup> CAFs.**

118 Representative IF staining of anti-PD1 responder and nonresponder tissues. DAPI (blue), SPP1  
 119 (green), CD68 (yellow) and POSTN (red) are shown in individual and merged channels. Bar,  
 120 100 µm.
